# Supplementary material for: Comparison of chemoradiotherapy with radiotherapy alone for “biopsy only” anaplastic astrocytoma
Source: PubMed Central journal article supplement (PMC5620319; doi:10.18632/oncotarget.17441), 2017-04-26
Supplement: oncotarget-08-69038-s001.pdf [file oncotarget-08-69038-s001.pdf]

# Comparison of chemoradiotherapy with radiotherapy alone for "biopsy only" anaplastic astrocytoma

## SUPPLEMENTARY MATERIALS

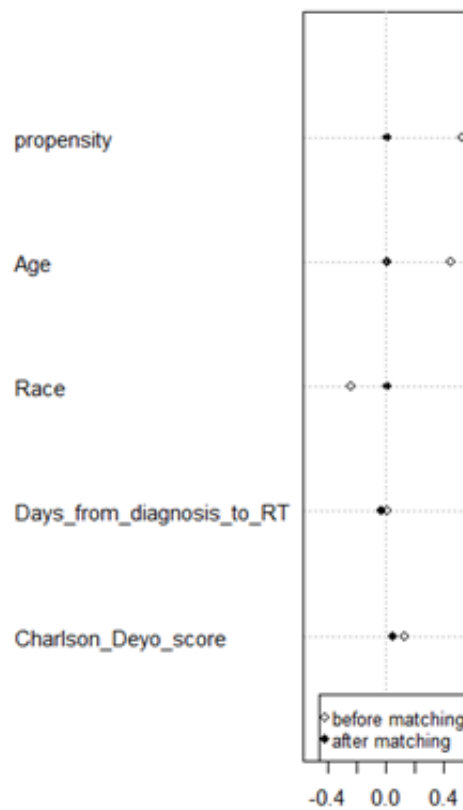

Supplementary Figure 1: Standardized differences of means showing well balanced covariates after propensity score matching.
